# Supplementary material for: An Interdisciplinary Assessment of Biochemical and Antioxidant Attributes of Six Greek Vicia sativa L. Varieties
Source: MDPI journal article supplement (doi:10.3390/plants12152807), 2023-07-28
Supplement: s1 [file s1]

**Table S1:** Results of Bonferroni tests**Total Phenolic Content****Biomass**

Anova: Single Factor

**SUMMARY**

| <i>Groups</i>   | <i>Count</i> | <i>Sum</i> | <i>Average</i> | <i>Variance</i> |
|-----------------|--------------|------------|----------------|-----------------|
| <i>Leonidas</i> | 3            | 0.3996     | 0.1332         | 9.48E-06        |
| <i>Line A</i>   | 3            | 0.3842     | 0.128067       | 0.005661        |
| <i>BI-233</i>   | 3            | 0.3645     | 0.1215         | 0.000211        |
| <i>Istros</i>   | 3            | 0.49       | 0.163333       | 6.07E-05        |
| <i>BI-65</i>    | 3            | 0.896      | 0.298667       | 0.000112        |
| <i>M-6900</i>   | 3            | 0.3743     | 0.124767       | 1.72E-05        |

**ANOVA**

| <i>Source of Variation</i> | <i>SS</i> | <i>df</i> | <i>MS</i> | <i>F</i> | <i>P-value</i> | <i>F crit</i> |
|----------------------------|-----------|-----------|-----------|----------|----------------|---------------|
| Between Groups             | 0.071058  | 5         | 0.014212  | 14.0445  | 0.000116       | 3.105875      |
| Within Groups              | 0.012143  | 12        | 0.001012  |          |                |               |
| Total                      | 0.083201  | 17        |           |          |                |               |

Since the p-value in the ANOVA table is less than 0.05 (0.000116), we have sufficient evidence to reject the null hypothesis. The mean exam scores between the 6 groups are not equal.

**p-values (Bonferroni Test)**

|                 | <i>Line A</i> | <i>BI-233</i> | <i>Istros</i> | <i>BI-65</i> | <i>M-6900</i> |
|-----------------|---------------|---------------|---------------|--------------|---------------|
| <i>Leonidas</i> | 0.912         | 0.244         | 0.003         | 0.000        | 0.048         |
| <i>Line A</i>   |               | 0.889         | 0.465         | 0.018        | 0.943         |
| <i>BI-233</i>   |               |               | 0.012         | 0.000        | 0.727         |
| <i>Istros</i>   |               |               |               | 0.000        | 0.002         |
| <i>BI-65</i>    |               |               |               |              | 0.000         |

**Grains**

Anova: Single Factor

**SUMMARY**

| <i>Groups</i> | <i>Count</i> | <i>Sum</i> | <i>Average</i> | <i>Variance</i> |
|---------------|--------------|------------|----------------|-----------------|
| <i>Istros</i> | 3            | 0.474      | 0.158          | 0.000433        |
| <i>BI-65</i>  | 3            | 0.3678     | 0.1226         | 0.000162        |
| <i>M-6900</i> | 3            | 0.2364     | 0.0788         | 0.00115         |

## ANOVA

| <i>Source of Variation</i> | <i>SS</i>  | <i>df</i> | <i>MS</i> | <i>F</i> | <i>P-value</i> | <i>F crit</i> |
|----------------------------|------------|-----------|-----------|----------|----------------|---------------|
| Between Groups             | 0.00944424 | 2         | 0.004722  | 8.119933 | 0.019636       | 5.143253      |
| Within Groups              | 0.00348928 | 6         | 0.000582  |          |                |               |
| Total                      | 0.01293352 | 8         |           |          |                |               |

Since the p-value in the ANOVA table is less than 0.05 (0.019636), we have sufficient evidence to reject the null hypothesis. The mean exam scores between the 6 groups are not equal.

p-values (Bonferroni Test)

|        | <i>BI-65</i> | <i>M-6900</i> |
|--------|--------------|---------------|
| Istros | 0.066        | 0.026         |
| BI-65  |              | 0.104         |

**Total Tannin Content****Biomass**

Anova: Single Factor

**SUMMARY**

| <i>Groups</i> | <i>Count</i> | <i>Sum</i> | <i>Average</i> | <i>Variance</i> |
|---------------|--------------|------------|----------------|-----------------|
| Line A        | 3            | 0.1677     | 0.0559         | 4.9E-07         |
| BI-65         | 3            | 0.2202     | 0.0734         | 3.6E-05         |
| M-6900        | 3            | 0.1458     | 0.0486         | 4.35E-05        |

## ANOVA

| <i>Source of Variation</i> | <i>SS</i> | <i>df</i> | <i>MS</i> | <i>F</i> | <i>P-value</i> | <i>F crit</i> |
|----------------------------|-----------|-----------|-----------|----------|----------------|---------------|
| Between Groups             | 0.000975  | 2         | 0.000487  | 18.27338 | 0.002804       | 5.143253      |
| Within Groups              | 0.00016   | 6         | 2.67E-05  |          |                |               |
| Total                      | 0.001135  | 8         |           |          |                |               |

Since the p-value in the ANOVA table is less than 0.05 (0.002804), we have sufficient evidence to reject the null hypothesis. The mean exam scores between the 6 groups are not equal.

p-values (Bonferroni Test)

|        | <i>BI-65</i> | <i>M-6900</i> |
|--------|--------------|---------------|
| Line A | 0.007408     | 0.129222      |
| BI-65  |              | 0.00854       |

### DPPH-Hexane

#### **Biomass**

Anova: Single Factor

#### SUMMARY

| <i>Groups</i> | <i>Count</i> | <i>Sum</i> | <i>Average</i> | <i>Variance</i> |
|---------------|--------------|------------|----------------|-----------------|
| <i>BI-65</i>  | 3            | 3.7        | 1.233333       | 9.81E-05        |
| <i>BI-233</i> | 3            | 3.7036     | 1.234533       | 0.000295        |
| <i>Istros</i> | 3            | 3.8811     | 1.2937         | 0.005685        |
| <i>M-6900</i> | 3            | 3.7702     | 1.256733       | 0.002252        |

#### ANOVA

| <i>Source of Variation</i> | <i>SS</i> | <i>df</i> | <i>MS</i> | <i>F</i> | <i>P-value</i> | <i>F crit</i> |
|----------------------------|-----------|-----------|-----------|----------|----------------|---------------|
| Between Groups             | 0.007165  | 3         | 0.002388  | 1.146851 | 0.387541       | 4.066181      |
| Within Groups              | 0.01666   | 8         | 0.002082  |          |                |               |
| Total                      | 0.023825  | 11        |           |          |                |               |

#### p-values (Bonferroni Test)

|               | <i>BI-233</i> | <i>Istros</i> | <i>M-6900</i> |
|---------------|---------------|---------------|---------------|
| <i>BI-65</i>  | 0.922         | 0.241         | 0.450         |
| <i>BI-233</i> |               | 0.256         | 0.489         |
| <i>Istros</i> |               |               | 0.512         |

### DPPH-Methanol

#### **Biomass**

Anova: Single Factor

#### SUMMARY

| <i>Groups</i>   | <i>Count</i> | <i>Sum</i> | <i>Average</i> | <i>Variance</i> |
|-----------------|--------------|------------|----------------|-----------------|
| <i>Line A</i>   | 3            | 3.343      | 1.114333       | 0.000503        |
| <i>BI-65</i>    | 3            | 3.2707     | 1.090233       | 0.000104        |
| <i>Leonidas</i> | 3            | 3.7456     | 1.248533       | 0.000228        |
| <i>Istros</i>   | 3            | 3.8103     | 1.2701         | 0.000162        |
| <i>M-6900</i>   | 3            | 3.1743     | 1.0581         | 0.000665        |

#### ANOVA

| <i>Source of Variation</i> | <i>SS</i> | <i>df</i> | <i>MS</i> | <i>F</i> | <i>P-value</i> | <i>F crit</i> |
|----------------------------|-----------|-----------|-----------|----------|----------------|---------------|
| Between Groups             | 0.11168   | 4         | 0.02792   | 83.98154 | 1.18E-07       | 3.47805       |
| Within Groups              | 0.003325  | 10        | 0.000332  |          |                |               |
| Total                      | 0.115005  | 14        |           |          |                |               |

Since the p-value in the ANOVA table is less than 0.05, we have sufficient evidence to reject the null hypothesis. The mean exam scores between the 6 groups are not equal.

p-values (Bonferroni Test)

|                 | <i>BI-65</i> | <i>Leonidas</i> | <i>Istros</i> | <i>M-6900</i> |
|-----------------|--------------|-----------------|---------------|---------------|
| <i>Line A</i>   | 0.165        | 0.001           | 0.000         | 0.046         |
| <i>BI-65</i>    |              | 0.000           | 0.000         | 0.115         |
| <i>Leonidas</i> |              |                 | 0.132         | 0.000         |
| <i>Istros</i>   |              |                 |               | 0.000         |

**Grains**

Anova: Single Factor

**SUMMARY**

| <i>Groups</i> | <i>Count</i> | <i>Sum</i> | <i>Average</i> | <i>Variance</i> |
|---------------|--------------|------------|----------------|-----------------|
| <i>BI-65</i>  | 3            | 3.7013     | 1.233767       | 6.48E-05        |
| <i>Istros</i> | 3            | 3.739      | 1.246333       | 0.000151        |

**ANOVA**

| <i>Source of Variation</i> | <i>SS</i> | <i>df</i> | <i>MS</i> | <i>F</i> | <i>P-value</i> | <i>F crit</i> |
|----------------------------|-----------|-----------|-----------|----------|----------------|---------------|
| Between Groups             | 0.000237  | 1         | 0.000237  | 2.191151 | 0.212911       | 7.708647      |
| Within Groups              | 0.000432  | 4         | 0.000108  |          |                |               |
| Total                      | 0.000669  | 5         |           |          |                |               |

p-value (Bonferroni Test): BI-65, Istros: 0.213

**FRAP Hexane**

**ANOVA**

**SUMMARY**

| <i>Groups</i>   | <i>Count</i> | <i>Sum</i> | <i>Average</i> | <i>Variance</i> |
|-----------------|--------------|------------|----------------|-----------------|
| <i>Leonidas</i> | 3            | 1.2079     | 0.402633       | 0.000374        |
| <i>Line A</i>   | 3            | 1.2275     | 0.409167       | 5.86E-05        |
| <i>BI-233</i>   | 3            | 1.4982     | 0.4994         | 0.000153        |

|               |   |        |          |          |
|---------------|---|--------|----------|----------|
| <i>Istros</i> | 3 | 2.9613 | 0.9871   | 0.0024   |
| <i>BI-65</i>  | 3 | 2.4033 | 0.8011   | 0.000206 |
| <i>M-6900</i> | 3 | 2.6366 | 0.878867 | 0.000581 |

#### ANOVA

| <i>Source of Variation</i> | <i>SS</i> | <i>df</i> | <i>MS</i> | <i>F</i> | <i>P-value</i> | <i>F crit</i> |
|----------------------------|-----------|-----------|-----------|----------|----------------|---------------|
| Between Groups             | 0.989094  | 5         | 0.197819  | 314.5756 | 2.74E-12       | 3.105875      |
| Within Groups              | 0.007546  | 12        | 0.000629  |          |                |               |
| Total                      | 0.99664   | 17        |           |          |                |               |

Since the p-value in the ANOVA table is less than 0.05, we have sufficient evidence to reject the null hypothesis. The mean exam scores between the 6 groups are not equal.

#### p-values (Bonferroni Test)

|                 | <i>Line A</i> | <i>BI-233</i> | <i>Istros</i> | <i>BI-65</i> | <i>M-6900</i> |
|-----------------|---------------|---------------|---------------|--------------|---------------|
| <i>Leonidas</i> | 0.615         | 0.002         | 0.000         | 0.000        | 0.000         |
| <i>Line A</i>   |               | 0.000         | 0.000         | 0.000        | 0.000         |
| <i>BI-233</i>   |               |               | 0.000         | 0.000        | 0.000         |
| <i>Istros</i>   |               |               |               | 0.003        | 0.026         |
| <i>BI-65</i>    |               |               |               |              | 0.009         |

#### Grains

Anova: Single Factor

#### SUMMARY

| <i>Groups</i> | <i>Count</i> | <i>Sum</i> | <i>Average</i> | <i>Variance</i> |
|---------------|--------------|------------|----------------|-----------------|
| <i>Istros</i> | 3            | 0.4957     | 0.165233       | 3.25E-05        |
| <i>BI-65</i>  | 3            | 0.4466     | 0.148867       | 1.92E-06        |
| <i>M-6900</i> | 3            | 0.4509     | 0.1503         | 3.88E-06        |

#### ANOVA

| <i>Source of Variation</i> | <i>SS</i> | <i>df</i> | <i>MS</i> | <i>F</i> | <i>P-value</i> | <i>F crit</i> |
|----------------------------|-----------|-----------|-----------|----------|----------------|---------------|
| Between Groups             | 0.000493  | 2         | 0.000246  | 19.30186 | 0.002434       | 5.143253      |
| Within Groups              | 7.66E-05  | 6         | 1.28E-05  |          |                |               |
| Total                      | 0.00057   | 8         |           |          |                |               |

Since the p-value in the ANOVA table is less than 0.05, we have sufficient evidence to reject the null hypothesis. The mean exam scores between the 6 groups are not equal.

p-values (Bonferroni Test)

|               | <i>BI-65</i> | <i>M-6900</i> |
|---------------|--------------|---------------|
| <i>Istros</i> | 0.008        | 0.013         |
| <i>BI-65</i>  |              | 0.361         |

**FRAP Dichloromethane**

**Biomass**

Anova: Single Factor

**SUMMARY**

| <i>Groups</i> | <i>Count</i> | <i>Sum</i> | <i>Average</i> | <i>Variance</i> |
|---------------|--------------|------------|----------------|-----------------|
| Leonidas      | 3            | 3.7553     | 1.251767       | 0.000359        |
| Line A        | 3            | 1.13       | 0.376667       | 1.09E-05        |
| <i>BI-233</i> | 3            | 1.3259     | 0.441967       | 9.54E-06        |
| <i>Istros</i> | 3            | 0.6247     | 0.208233       | 7.15E-05        |
| <i>BI-65</i>  | 3            | 1.5424     | 0.514133       | 0.000149        |
| <i>M-6900</i> | 3            | 0.7942     | 0.264733       | 4.87E-05        |

**ANOVA**

| <i>Source of Variation</i> | <i>SS</i> | <i>df</i> | <i>MS</i> | <i>F</i> | <i>P-value</i> | <i>F crit</i> |
|----------------------------|-----------|-----------|-----------|----------|----------------|---------------|
| Between Groups             | 2.171577  | 5         | 0.434315  | 4018.958 | 6.62E-19       | 3.105875      |
| Within Groups              | 0.001297  | 12        | 0.000108  |          |                |               |
| Total                      | 2.172874  | 17        |           |          |                |               |

Since the p-value in the ANOVA table is less than 0.05, we have sufficient evidence to reject the null hypothesis. The mean exam scores between the 6 groups are not equal.

p-values (Bonferroni Test)

|                 | <i>Line A</i> | <i>BI-233</i> | <i>Istros</i> | <i>BI-65</i> | <i>M-6900</i> |
|-----------------|---------------|---------------|---------------|--------------|---------------|
| <i>Leonidas</i> | 0.000         | 0.000         | 0.000         | 0.000        | 0.000         |
| <i>Line A</i>   |               | 0.000         | 0.000         | 0.000        | 0.000         |
| <i>BI-233</i>   |               |               | 0.000         | 0.001        | 0.000         |
| <i>Istros</i>   |               |               |               | 0.000        | 0.001         |
| <i>BI-65</i>    |               |               |               |              | 0.000         |

**Grains**

Anova: Single Factor

SUMMARY

| <i>Groups</i> | <i>Count</i> | <i>Sum</i> | <i>Average</i> | <i>Variance</i> |
|---------------|--------------|------------|----------------|-----------------|
| Istros        | 3            | 0.3332     | 0.111067       | 9.43E-07        |
| BI-65         | 3            | 0.4011     | 0.1337         | 2.41E-06        |
| M-6900        | 3            | 0.449      | 0.149667       | 3.61E-05        |

ANOVA

| <i>Source of Variation</i> | <i>SS</i> | <i>df</i> | <i>MS</i> | <i>F</i> | <i>P-value</i> | <i>F crit</i> |
|----------------------------|-----------|-----------|-----------|----------|----------------|---------------|
| Between Groups             | 0.002257  | 2         | 0.001129  | 85.89624 | 3.84E-05       | 5.143253      |
| Within Groups              | 7.88E-05  | 6         | 1.31E-05  |          |                |               |
| Total                      | 0.002336  | 8         |           |          |                |               |

Since the p-value in the ANOVA table is less than 0.05, we have sufficient evidence to reject the null hypothesis. The mean exam scores between the 6 groups are not equal.

p-values (Bonferroni Test)

|               | <i>BI-65</i> | <i>M-6900</i> |
|---------------|--------------|---------------|
| <i>Istros</i> | 0.000        | 0.000         |
| <i>BI-65</i>  |              | 0.011         |

**FRAP-Methanol**

**Biomass**

Anova: Single Factor

SUMMARY

| <i>Groups</i>   | <i>Count</i> | <i>Sum</i> | <i>Average</i> | <i>Variance</i> |
|-----------------|--------------|------------|----------------|-----------------|
| <i>Leonidas</i> | 3            | 1.6229     | 0.540967       | 2.94E-05        |
| <i>Line A</i>   | 3            | 2.2685     | 0.756167       | 0.001008        |
| <i>BI-233</i>   | 3            | 1.079      | 0.359667       | 9.43E-07        |
| <i>Istros</i>   | 3            | 1.3808     | 0.460267       | 4.53E-05        |
| <i>BI-65</i>    | 3            | 2.3072     | 0.769067       | 0.004026        |
| <i>M-6900</i>   | 3            | 2.6313     | 0.8771         | 0.005031        |

ANOVA

| <i>Source of Variation</i> | <i>SS</i> | <i>df</i> | <i>MS</i> | <i>F</i> | <i>P-value</i> | <i>F crit</i> |
|----------------------------|-----------|-----------|-----------|----------|----------------|---------------|
| Between Groups             | 0.618257  | 5         | 0.123651  | 73.15654 | 1.45E-08       | 3.105875      |
| Within Groups              | 0.020283  | 12        | 0.00169   |          |                |               |
| Total                      | 0.638539  | 17        |           |          |                |               |

Since the p-value in the ANOVA table is less than 0.05, we have sufficient evidence to reject the null hypothesis. The mean exam scores between the 6 groups are not equal.

p-values (Bonferroni Test)

|                 | <i>Line A</i> | <i>BI-233</i> | <i>Istros</i> | <i>BI-65</i> | <i>M-6900</i> |
|-----------------|---------------|---------------|---------------|--------------|---------------|
| <i>Leonidas</i> | 0.000         | 0.000         | 0.000         | 0.003        | 0.001         |
| <i>Line A</i>   |               | 0.000         | 0.000         | 0.769        | 0.054         |
| <i>BI-233</i>   |               |               | 0.000         | 0.000        | 0.000         |
| <i>Istros</i>   |               |               |               | 0.001        | 0.001         |
| <i>BI-65</i>    |               |               |               |              | 0.121         |

**Grains**

Anova: Single Factor

**SUMMARY**

| <i>Groups</i> | <i>Count</i> | <i>Sum</i> | <i>Average</i> | <i>Variance</i> |
|---------------|--------------|------------|----------------|-----------------|
| <i>Istros</i> | 3            | 1.2261     | 0.4087         | 1.25E-05        |
| <i>BI-65</i>  | 3            | 1.2816     | 0.4272         | 0.000428        |
| <i>M-6900</i> | 3            | 0.768      | 0.256          | 4.89E-06        |

**ANOVA**

| <i>Source of Variation</i> | <i>SS</i> | <i>df</i> | <i>MS</i> | <i>F</i> | <i>P-value</i> | <i>F crit</i> |
|----------------------------|-----------|-----------|-----------|----------|----------------|---------------|
| Between Groups             | 0.052969  | 2         | 0.026484  | 178.2667 | 4.53E-06       | 5.143253      |
| Within Groups              | 0.000891  | 6         | 0.000149  |          |                |               |
| Total                      | 0.05386   | 8         |           |          |                |               |

Since the p-value in the ANOVA table is less than 0.05, we have sufficient evidence to reject the null hypothesis. The mean exam scores between the 6 groups are not equal.

p-values (Bonferroni Test)

|               | <i>BI-65</i> | <i>M-6900</i> |
|---------------|--------------|---------------|
| <i>Istros</i> | 0.202        | 0.000         |
| <i>BI-65</i>  |              | 0.000         |
